# Supplementary material for: DQPB: software for calculating disequilibrium U–Pb ages
Source: Copernicus journal article supplement (doi:10.5194/gchron-5-181-2023), 2023-04-20
Supplement: Supplementary file 1 [file gchron-5-181-2023-supplement.zip]

Archive with 4 entries (4 files):
- Sambe-Kisuki data.csv
- Supplement.pdf
- CCB data.csv
- gchron-5-181-2023-supplement-title-page.pdf
