# Supplementary material for: DQPB: software for calculating disequilibrium U–Pb ages
Source: Copernicus journal article supplement (doi:10.5194/gchron-5-181-2023), 2023-04-20
Supplement: Supplementary file 1 [file gchron-5-181-2023-supplement.zip › CCB data.csv]

Stalagmite CCB U-Pb isotopic data
238U/206Pb	2 sigma (%)	207Pb/206Pb	2 sigma (%)	corr. coef.
2641.64562	1.761693	0.688574	0.547513	-0.945746
2057.430277	0.986945	0.715533	0.246794	-0.81415
7130.576611	8.993144	0.480454	8.014919	-0.997099
9902.856084	9.535765	0.345753	15.514924	-0.998499
1335.923599	0.641038	0.7509	0.131639	-0.489731
Measured [234U/238U] = 0.9512 +/- 0.0013 (2 SE)
