# Supplementary material for: DQPB: software for calculating disequilibrium U–Pb ages
Source: Copernicus journal article supplement (doi:10.5194/gchron-5-181-2023), 2023-04-20
Supplement: Supplementary file 1 [file gchron-5-181-2023-supplement.zip › gchron-5-181-2023-supplement-title-page.pdf]

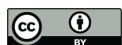

## *Supplement of*

## **DQPB: software for calculating disequilibrium U–Pb ages**

**Timothy Pollard et al.**

*Correspondence to:* Timothy Pollard ([pollard@student.unimelb.edu.au](mailto:pollard@student.unimelb.edu.au))

- [gchron-5-181-2023-supplement-title-page.pdf](#)
- [CCB data.csv](#)
- [Sambe-Kisuki data.csv](#)
- [Supplement.pdf](#)

The copyright of individual parts of the supplement might differ from the article licence.
