# Supplementary material for: DQPB: software for calculating disequilibrium U–Pb ages
Source: Copernicus journal article supplement (doi:10.5194/gchron-5-181-2023), 2023-04-20
Supplement: Supplementary file 1 [file gchron-5-181-2023-supplement.zip › Sambe-Kisuki data.csv]

Sambe-Kisuki tephra zircon data
Collected by Dr. Shuhei Sakata (unpublished)
206Pb/238U	1 sigma (abs.)	207Pb/206Pb	1 sigma (abs.)
7.14538E-06	3.66287E-07	0.226922	0.028834
6.51571E-06	3.10352E-07	0.217004	0.026083
7.22118E-06	4.23795E-07	0.228294	0.033174
1.02255E-05	4.3201E-07	0.382523	0.032419
8.53178E-06	3.82845E-07	0.184037	0.022341
6.68028E-06	3.13188E-07	0.218862	0.025794
Assumed common 207Pb/206Pb = 0.8356
Assumed D_Th/U = 0.2 +/- 0.06 (2 sigma)
Assumed D_Pa/U = 3.4 +/- 0.8 (2 sigma)
