# Supplementary material for: DQPB: software for calculating disequilibrium U–Pb ages
Source: Copernicus journal article supplement (doi:10.5194/gchron-5-181-2023), 2023-04-20
Supplement: Supplementary file 1 [file gchron-5-181-2023-supplement.zip › Supplement.pdf]

---

**DQPB**

***Release 0.1.1***

**Timothy Pollard et al.**

**Mar 02, 2023**

## CONTENTS:

|          |                                                                          |           |
|----------|--------------------------------------------------------------------------|-----------|
| <b>1</b> | <b>Citing this work</b>                                                  | <b>2</b>  |
| <b>2</b> | <b>Installation</b>                                                      | <b>3</b>  |
| 2.1      | Mac . . . . .                                                            | 3         |
| 2.2      | Windows . . . . .                                                        | 3         |
| 2.3      | Verifying Installation . . . . .                                         | 4         |
| 2.4      | Uninstalling DQPB . . . . .                                              | 4         |
| <b>3</b> | <b>Basic usage</b>                                                       | <b>5</b>  |
| <b>4</b> | <b>Age calculations</b>                                                  | <b>9</b>  |
| 4.1      | U-Pb concordia intercept ages . . . . .                                  | 9         |
| 4.2      | U-Pb isochron ages . . . . .                                             | 11        |
| 4.3      | Single aliquot Pb/U and $^{207}\text{Pb}$ -corrected ages . . . . .      | 11        |
| 4.4      | Concordant initial [ $^{234}\text{U}/^{238}\text{U}$ ] routine . . . . . | 12        |
| <b>5</b> | <b>Age uncertainties</b>                                                 | <b>13</b> |
| 5.1      | Analytical uncertainties . . . . .                                       | 13        |
| 5.2      | Monte Carlo uncertainties . . . . .                                      | 13        |
| <b>6</b> | <b>Other calculation and plotting functionality</b>                      | <b>20</b> |
| 6.1      | Plot any x-y data . . . . .                                              | 20        |
| 6.2      | Linear regression of any x-y data . . . . .                              | 20        |
| 6.3      | Weighted average calculations . . . . .                                  | 21        |
| <b>7</b> | <b>Linear regression algorithms</b>                                      | <b>22</b> |
| 7.1      | Classical . . . . .                                                      | 22        |
| 7.2      | Spine . . . . .                                                          | 22        |
| 7.3      | Robust model 2 . . . . .                                                 | 22        |
| 7.4      | Model 1 . . . . .                                                        | 23        |
| 7.5      | Model 1x . . . . .                                                       | 23        |
| 7.6      | Model 2 . . . . .                                                        | 23        |
| 7.7      | Model 3 . . . . .                                                        | 23        |
| <b>8</b> | <b>Weighted average algorithms</b>                                       | <b>24</b> |
| 8.1      | Classical . . . . .                                                      | 24        |
| 8.2      | Spine . . . . .                                                          | 24        |
| <b>9</b> | <b>Settings</b>                                                          | <b>25</b> |
| 9.1      | Main window settings . . . . .                                           | 25        |
| 9.2      | Preferences window . . . . .                                             | 27        |

|           |                                       |           |
|-----------|---------------------------------------|-----------|
| 9.3       | Type-specific plot settings . . . . . | 28        |
| <b>10</b> | <b>Troubleshooting</b>                | <b>32</b> |
| 10.1      | The log console . . . . .             | 32        |
| 10.2      | Unfreezing Excel workbooks . . . . .  | 32        |
| 10.3      | Overwriting old results . . . . .     | 32        |
| 10.4      | Crowded concordia markers . . . . .   | 32        |
| <b>11</b> | <b>Frequently asked questions</b>     | <b>34</b> |
|           | <b>Bibliography</b>                   | <b>35</b> |

DQPB is a stand-alone GUI application for geochronology that focusses on calculating disequilibrium U-Pb ages and plotting results. It can also be used for computing standard (equilibrium) U-Pb ages, performing linear regression and computing weighted averages.

The software allows isotopic data to be read directly from open Microsoft Excel spreadsheets, and results (both graphical and numerical) printed back to the same worksheet once computations are completed. In this way, it aims to emulate the ease of use of Ken Ludwig's popular Isoplot/Ex program. The program is distributed on Windows and macOS as a stand-alone application that does not require a pre-existing Python installation to run.

DQPB can be used to:

- Calculate disequilibrium U-Pb concordia intercept ages on a Tera-Wasserburg diagram
- Calculate disequilibrium  $^{238}\text{U}$ - $^{206}\text{Pb}$  and  $^{235}\text{U}$ - $^{207}\text{Pb}$  isochron ages
- Calculate disequilibrium radiogenic  $^{206}\text{Pb}/^{238}\text{U}$  and  $^{207}\text{Pb}/^{235}\text{U}$  (single aliquot) ages
- Calculate disequilibrium  $^{207}\text{Pb}$ -corrected ages
- Calculate initial equilibrium U-Pb ages using the above approaches.
- Compute “concordant” initial  $[^{234}\text{U}/^{238}\text{U}]$  values from U-Pb isochron data using the routine described in [ENGEL2019]
- Perform linear regression using algorithms that are based on classical statistics (i.e., the model 1, 2, and 3 popularised by Isoplot [LUDWIG2012], or robust statistics (i.e., the spine algorithm of [POWELL2020] and a new “robust model 2” algorithm).
- Compute weighted averages that optionally account for uncertainty covariances using both classical and robust algorithms
- Plot data points and disequilibrium concordia curves on a Tera-Wasserburg diagram

The functionality of DQPB is also available as part of a pure Python package for more experienced Python users. For this version, see the [Pysoplot](#) GitHub page.

---

**Note:** The most up to date version of the DQPB documentation can be found at the DQPB [GitHub](#) page.

---

## CITING THIS WORK

If using DQPB in published work, please cite the companion Geochronology article.

In addition, please cite primary works upon which the algorithms implemented in DQPB are based. This information may be found within this documentation and in the DQPB source code.

## INSTALLATION

The easiest way to install DQPB on macOS and Windows is to simply download the latest installer from the GitHub DQPB [releases](#) page. These installers provide a stand-alone version of the software, that does not require a separate Python distribution.

### 2.1 Mac

1. Download the Mac [.dmg installer](#)
2. Open the .dmg and drag the DQPB.app icon into your Applications folder to install the software.
3. Navigate to your Applications folder.
4. Right-click on the icon and select **Open** to launch the Application for the first time.

---

**Note:** The application will probably refuse to launch if you double-click on the icon the first time you try to open it. You **must** right-click and select **Open**. After the first launch, it is then possible to launch the application by double clicking.

---

5. A security message may pop up saying that this app is from an “unknown developer” and asking if you wish to continue. DQPB is open-source software distributed free of charge, and so we have opted not to pay fees to Apple to codesign the application. Therefore, this warning cannot be avoided.
6. When running DQPB for the first time, you will probably be asked to give permission to DQPB to “control Excel”. You **must** click **OK**, otherwise DQPB will not be able to read data from Excel spreadsheets or write results, and the application will not function.

### 2.2 Windows

1. Download the Windows [installer](#)
2. Launch the installer and follow the usual steps to install the software.

---

**Note:** On some versions of Windows, a Windows Defender warning may pop up claiming that DQPB is an “unrecognized” app. DQPB is open-source software distributed free of charge, so we have opted not to pay fees to Microsoft or other third parties in order to codesign the application. Therefore, this warning cannot be avoided. Click the **More info** link, then click **Run anyway**.

---

3. The application can now be launched from the start menu. If for some reason the icon does not appear, go to the installation directory (usually `C:\Program Files\DQPB\`) and double-click the `DQPB.exe` icon. A shortcut to this .exe file may then be manually added to the start menu or another suitable location.

## 2.3 Verifying Installation

To verify that the installation was successful and explore software features, test data sets may be downloaded from the [DQPB Github page](#) in .csv format. These can be opened in Excel workbooks like any other .csv or text files.

## 2.4 Uninstalling DQPB

- On Mac, simply delete `DQPB.app` from your Applications folder.
- On Windows, go to the `Add or remove programs` dialog. Click on the `DQPB` icon and select `Uninstall`.

## BASIC USAGE

Begin by launching the main application window via the app icon. If running DQPB for the first time on Mac, you will need to right-click on the application icon and select **Open**, rather than double-clicking.

All tasks are invoked via the main window, which is displayed when the application is first launched. After choosing a task from the drop-down menu, some options on this main menu may be altered or deactivated if they are not applicable. Further settings may be adjusted via the *Preferences*, *Type-specific plot settings*, and *Plot format settings* dialogs.

**Caution:** It is recommended that you save and backup your Excel workbook before running DQPB for the first time in case something unexpected happens (e.g., spreadsheet data cells are accidentally overwritten).

1. Choose an age calculation or plotting task from the task drop-down menu at the top-left.
2. Select the appropriate data type from the 'Data Type' drop-down menu.
3. Select the input data points from an open Microsoft Excel spreadsheet, by clicking the **select** button in the 'Data range' group box. This will hide the main window and launch a smaller data selection dialog. The easiest way to select data is to navigate to the worksheet containing your data and highlight the data with the keyboard or mouse in the normal Excel way (excluding headings). Then click **Get selection** on the data selection dialog.
4. DQPB will read the data from Excel. The data selection will typically be  $n$  rows  $\times$   $m$  columns, where  $n$  is the number of data points and  $m$  is the number of variables required, but see the *age calculations* section for further details on how to arrange your data.
5. Choose the appropriate input data error type, either absolute (abs.) or percent at the 1 or 2 sigma level.

---

**Note:** If the incorrect input error type is selected, the task may still run without error but you will receive very strange results. For example, data point uncertainty ellipses may be highly elongated in one direction or completely flat!

Future versions of the software will check that selected uncertainties are of a reasonable magnitude to guard against accidentally making the wrong selection, but for now, keep an eye out for this.

---

6. Choose a linear regression fit type.
7. Go to the **Disequilibrium** tab on the main window. To compute a disequilibrium U-Pb age, enter relevant activity ratio values (or Th/U and/or Pa/U ratio data for single-analysis Pb/U ages). Alternatively, to compute an equilibrium age (using the standard U-Pb equations) check the **Assume initial equilibrium** option.
8. Click **Ok**. The main dialog will be hidden, and some further dialogs may pop up asking for additional settings and options to be specified.

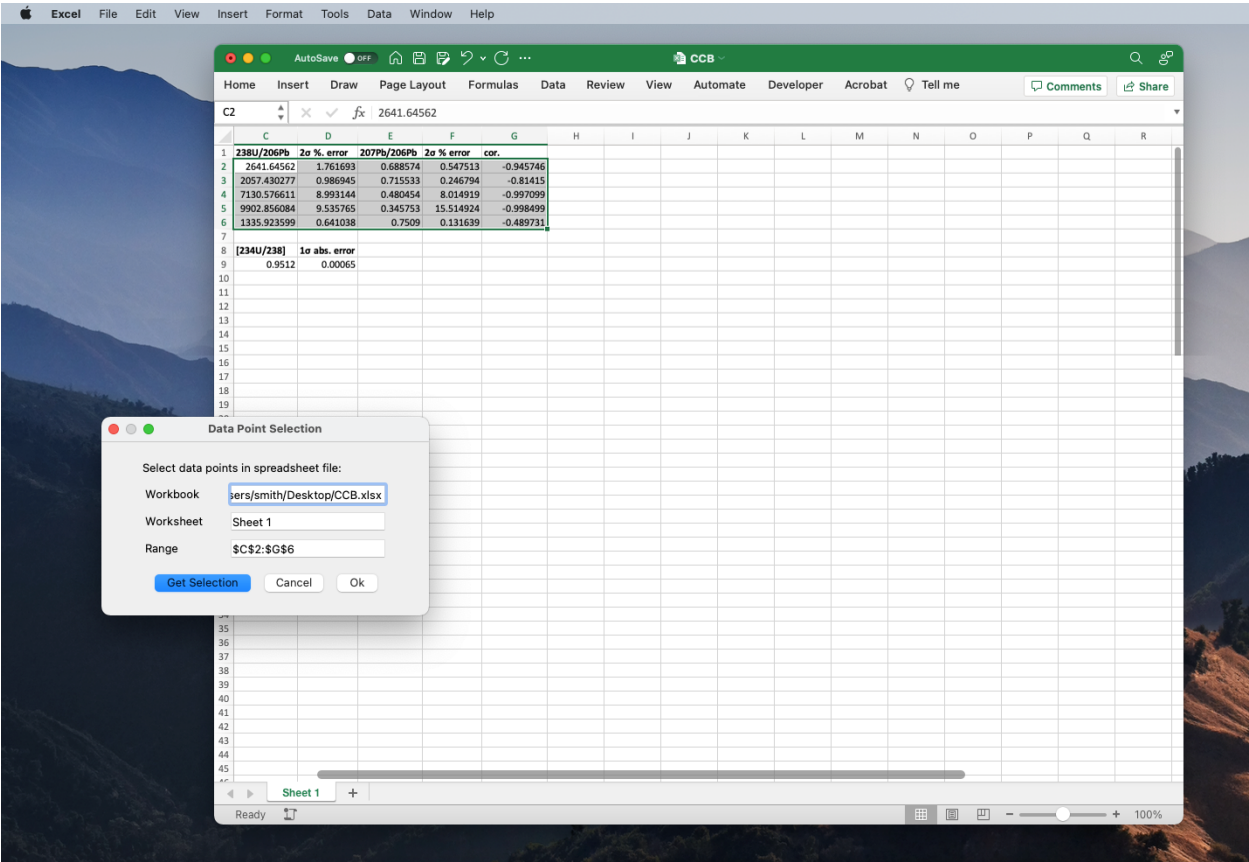

Fig. 3.2: Data selection dialog on Mac

9. One of these dialogs will ask you to select where in Excel the data should be output to. A single cell may be selected in the same workbook as your data, but care needs to be taken not to overwrite pre-existing data, as the results may be spread over multiple cells down and across to the right.

**Caution:** Data cells that are overwritten by DQPB results cannot be undone in the normal Excel way, so please save and backup important data before running DQPB!

10. Click Ok. A progress bar will then appear showing the progress of the computations.
11. When the task is complete, results and figures (in .jpg format) will be printed back to the Excel worksheet.

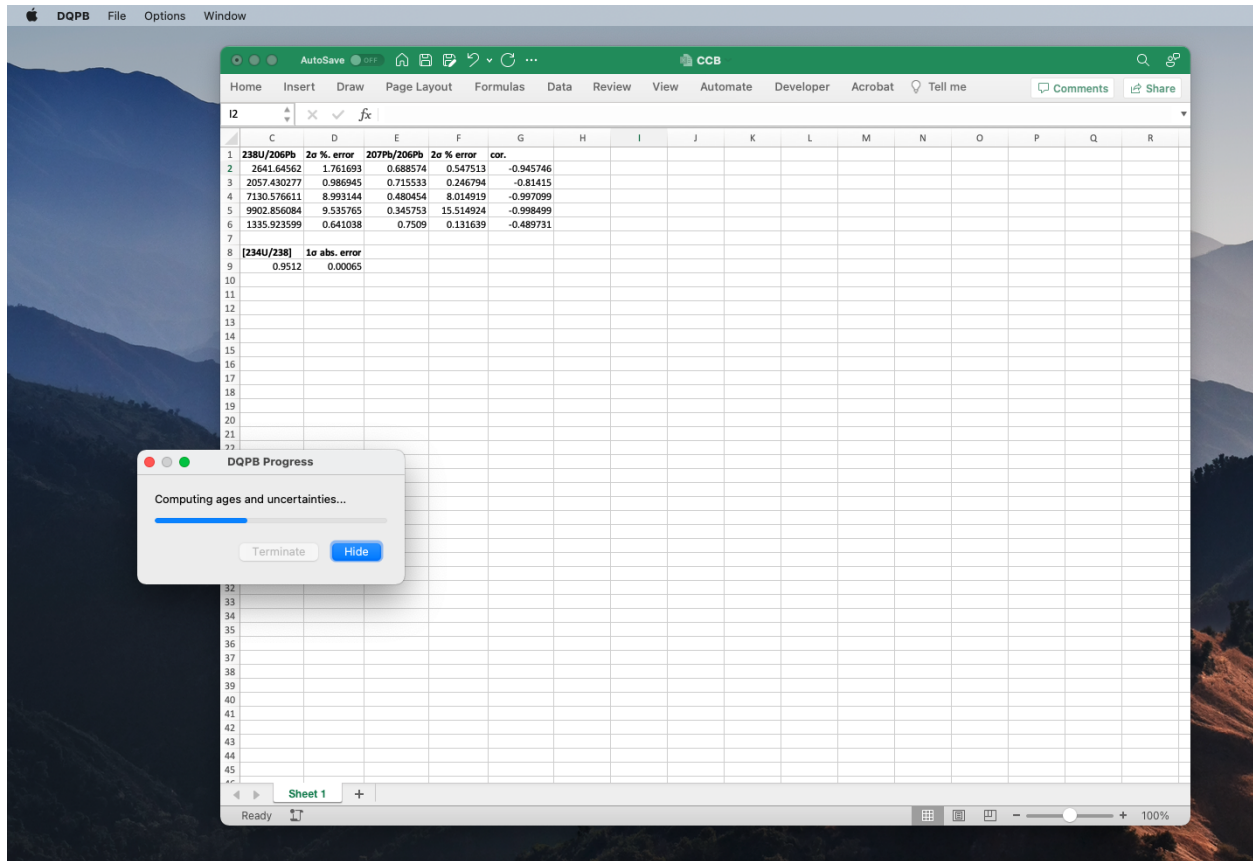

Fig. 3.3: Progress bar on Mac with results printed to the Excel workbook

12. If an error occurs during the computation (e.g., if no disequilibrium age solution is found), the task will be aborted, and an error dialog will be displayed. If this happens, check the log console for information on what went wrong (in the file menu go to Window -> Log console....)

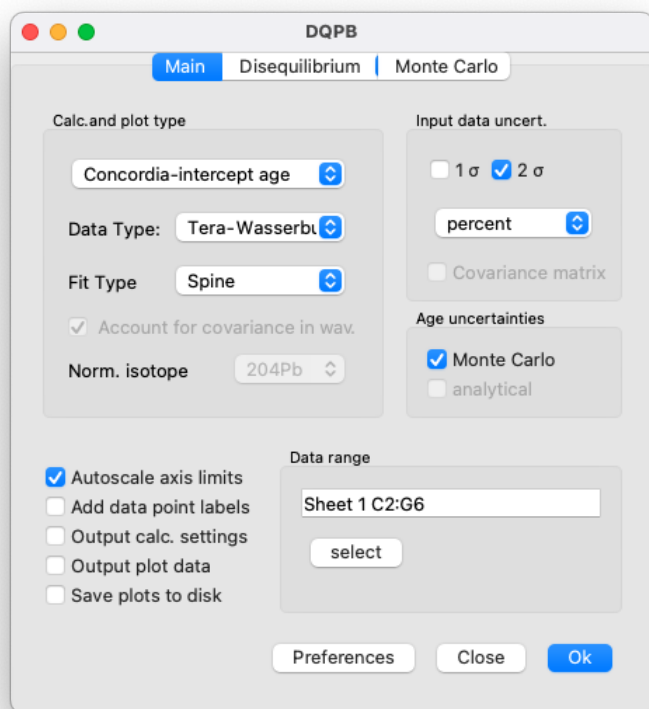

Fig. 3.1: Main window on Mac.

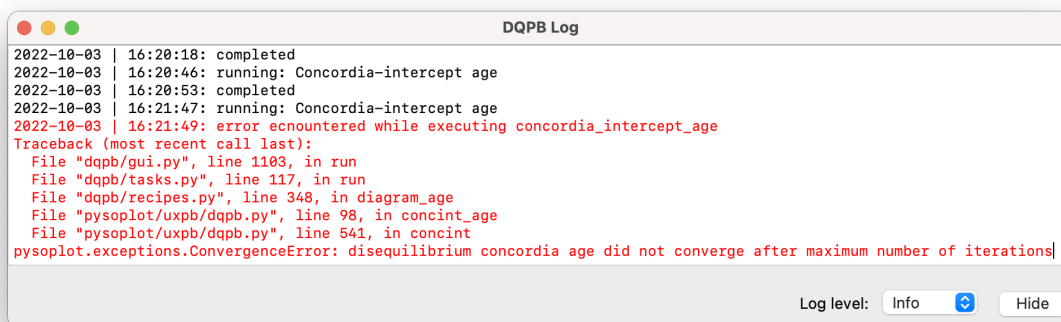

Fig. 3.4: Example of the log console window on Mac

## AGE CALCULATIONS

### 4.1 U-Pb concordia intercept ages

Concordia intercept ages are computed using Tera-Wasserburg diagram variables only. I.e., spreadsheet columns ordered as:

$^{206}\text{Pb}/^{238}\text{U}$ ,  $u(^{238}\text{U}/^{206}\text{U})$ ,  $^{207}\text{Pb}/^{206}\text{Pb}$ ,  $u(^{207}\text{Pb}/^{206}\text{U})$ ,  $\rho$  (optional))

where  $u$  denotes uncertainty (at given  $\sigma$  level), and  $\rho$  denotes correlation coefficient.

**Caution:** If the data point error correlation coefficients column is not provided, these correlations will be assumed equal to 0. This is not a good general assumption for young samples!

Disequilibrium concordia intercept ages are calculated by solving Eq. (15) in the [manuscript](#) using Newton's method. The initial guess for the numerical age solution can either be entered directly (under the 'Disequilibrium' tab of the main window) or set to the lower intercept equilibrium age by selecting the `Use equilibrium age` option.

In cases where present-day  $[^{234}\text{U}/^{238}\text{U}]$  or  $[^{230}\text{Th}/^{238}\text{U}]$  values are entered, it is possible to have two intercept age solutions in close proximity. In such cases, the algorithm uses a brute force method to search for all age solutions between user defined upper and lower age and activity ratio limits (set in set in the 'Numerical' tab of the [Preferences](#) window). Typically, the upper intercept will have a physically implausible initial activity ratio solution, and so the lower intercept is always selected by default, however, the brute force method is implemented to guard against the numerical solution converging to the wrong intercept age.

If the `assume initial eq.` option is checked, a lower intercept initial equilibrium age will be computed from the standard U-Pb equations, using the algorithm in [\[POWELL2020\]](#). Note, this algorithm converges rapidly for intercept ages less than ~1 Ga but may not converge for older ages and does not propagate decay constant errors.

For equilibrium ages, age uncertainties may optionally be computed using Monte Carlo methods. To do this, ensure the `Equilibrium age Monte Carlo errors` option is checked on the main window (note, for disequilibrium ages, Monte Carlo errors are always implemented whether this box is checked or not). Decay constant errors may be included if age uncertainties are computed by Monte Carlo simulation (see the 'Monte Carlo' tab in main window).

For concordia intercept ages, two separate plots are output by default. The first is an "isochron" style plot showing the data points as 95% confidence ellipses along with the linear regression fit. The second plot is a "concordia intercept plot" and shows an enlarged view of the intersection between the regression line and the (dis)equilibrium concordia curve.

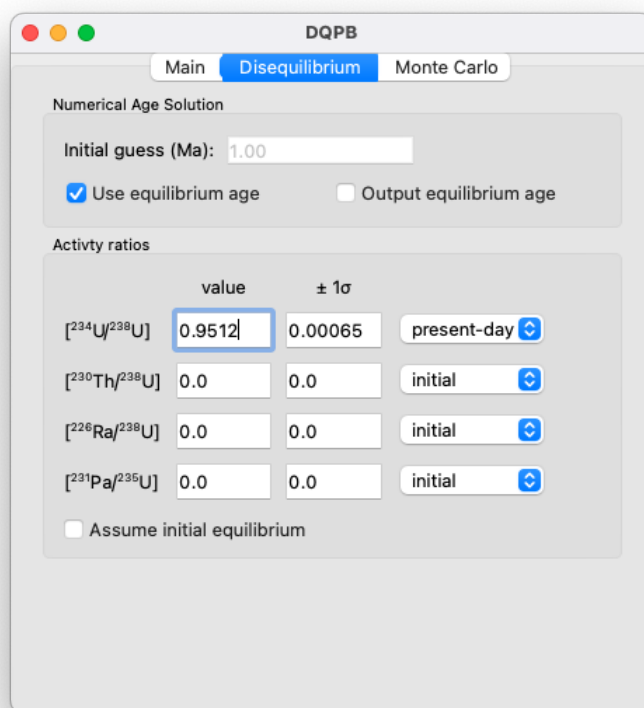

Fig. 4.1: Disequilibrium tab of the main window on Mac

## 4.2 U-Pb isochron ages

To compute U-Pb isochron ages the data points should be arranged with columns ordered as:

$^{206}\text{Pb}/^{20x}\text{Pb}$ ,  $u(^{206}\text{Pb}/^{20x}\text{Pb})$ ,  $^{23y}\text{U}/^{20x}\text{Pb}$ ,  $u(^{23y}\text{U}/^{20x}\text{Pb})$ ,  $\rho$  (optional)

where  $^{23y}\text{U}$  is the primordial uranium isotope (either  $^{238}\text{U}$  or  $^{235}\text{U}$ ), and  $^{20x}\text{Pb}$  is the normalising isotope (either  $^{204}\text{Pb}$  or  $^{208}\text{Pb}$ , with  $^{208}\text{Pb}$  assumed to be a non-radiogenic isotope and therefore, applicable to young samples with low initial Th content only),  $u$  denotes uncertainty (at given  $\sigma$  level), and  $\rho$  denotes correlation coefficient. Disequilibrium U-Pb isochron ages are calculated by solving the equations given in Sect. 3.2 of the [manuscript](#) using Newton's method. As for concordia intercept ages, the initial age guess can either be entered directly (under the *Disequilibrium* tab of the main window) or set to the equilibrium age. Again, age uncertainties may optionally be computed using Monte Carlo methods for equilibrium ages but are always implemented for disequilibrium ages.

## 4.3 Single aliquot Pb/U and $^{207}\text{Pb}$ -corrected ages

Typically, multiple co-genetic single aliquot Pb/U ages will be computed at once. For Pb/U ages, data points should be arranged with columns ordered as:

$^{206}\text{Pb}^*/^{238}\text{U}$ ,  $u(^{206}\text{Pb}^*/^{238}\text{U})$

or,

$^{207}\text{Pb}^*/^{235}\text{U}$ ,  $u(^{207}\text{Pb}^*/^{235}\text{U})$

where  $u$  denotes uncertainty (at given  $\sigma$  level). Each row provides isotopic data for a separate aliquot (i.e., a separate mineral grain or spot analysis). For  $^{207}\text{Pb}$ -corrected ages, data points should be arranged as Tera-Wasserburg diagram variables (i.e., columns ordered as [above](#)).

$^{206}\text{Pb}/^{238}\text{U}$  and  $^{207}\text{Pb}$ -corrected ages are either computed by assuming that (i) the partition coefficient ratio (i.e. Th/U) is constant for all mineral grains, but Th/U of the melt may be heterogenous, or (ii) Th/ $U_{\text{melt}}$  value is constant for all aliquots, but the partition coefficients may vary. For single aliquot  $^{207}\text{Pb}^*/^{235}\text{U}$  ages, only approach (i) is available. To implement approach i, ensure that **Single aliquot ages** is selected in the first tab of the main window along with the correct data type. Then under the 'Disequilibrium' tab, select '**DThU const.**' in the active combo box. The value and its uncertainty may then be set in the fields to the left.

To implement approach ii, select **Th/U melt const** from the combo box. The Th/U value of the melt and its uncertainty may then be entered in the fields to the left. After clicking OK, a separate dialog pops up allowing either measured  $^{232}\text{Th}/^{238}\text{U}$  or  $^{208}\text{Pb}^*/^{206}\text{Pb}^*$  values and uncertainties to be selected from the spreadsheet. With this approach, Th/U of the mineral is inferred from these measured values and aliquot age, using an iterative procedure.

As for other age types, a single age guess can either be entered directly (under the 'Disequilibrium' tab of the main window) or set to the lower intercept equilibrium age solution(s).

To output a plot of data points on a Tera-Wasserburg diagram, select the **Output data point plot for  $^{207}\text{Pb}$ -corrected ages** option in 'Plotting' tab of the [Preferences](#) window. A disequilibrium concordia may also be plotted if the Th/U disequilibrium state is based on a constant Th/U value for all data points, depending on the settings in the [Type-specific plot settings](#) window.

To compute a weighted average age from multiple single-analysis ages, select either **spine** or **classical** from the Fit type combo box on the main window. To output a plot of the weighted average, ensure **Output weighted average plot** is checked in the Plotting tab of the [Preferences](#) window.

---

**Note:** The **Assume initial equilibrium** option is not yet implemented for single aliquot Pb/U ages.

---

## 4.4 Concordant initial [ $^{234}\text{U}/^{238}\text{U}$ ] routine

The concordant initial [ $^{234}\text{U}/^{238}\text{U}$ ] routine computes an initial [ $^{234}\text{U}/^{238}\text{U}$ ] value that results in agreement (i.e., “concordance”) between the  $^{238}\text{U}$ - $^{206}\text{Pb}$  and  $^{235}\text{U}$ - $^{207}\text{Pb}$  isochron ages following [ENGEL2019]. This routine requires two data selections, one to compute a  $^{235}\text{U}$ - $^{207}\text{Pb}$  isochron ages, and another to compute a  $^{238}\text{U}$ - $^{206}\text{Pb}$  isochron age. The columns for these data selections should be arranged as outlined above for *U-Pb isochron ages* above. After clicking Ok on the main window, a data point selection dialog will appear. The initial activity ratio state of isotopes other than  $^{234}\text{U}$  may be specified in the ‘Disequilibrium’ tab of the main window. Typically, for carbonates [ $^{230}\text{Th}/^{238}\text{U}$ ] and [ $^{231}\text{Pa}/^{235}\text{U}$ ] will be set to zero. Uncertainties in the initial [ $^{234}\text{U}/^{238}\text{U}$ ] value are computed using Monte Carlo methods.

## AGE UNCERTAINTIES

### 5.1 Analytical uncertainties

Age uncertainties may be calculated using a first-order analytical error propagation approach for all equilibrium U-Pb age calculations. For disequilibrium ages, they are currently only available for single analysis  $^{206}\text{Pb}^*$ ,  $^{207}\text{Pb}^*$  and  $^{207}\text{Pb}$ -corrected ages. To use this approach, select the `analytical` check box on the first tab of the main window.

### 5.2 Monte Carlo uncertainties

Monte Carlo uncertainty calculations can be more accurate than analytical approaches when uncertainties on the input variables (e.g., analytical uncertainties, activity ratios, etc.) are relatively large, and the output age distribution is significantly non-Gaussian. However, Monte Carlo approaches can deliver unreliable results when a large number of trials fail, or when a large number of simulated variables take non-physical values (e.g., negative simulated activity ratios). To avoid these problems going unnoticed, DQPB performs checks on Monte Carlo input data and results, and then alerts the user of any potential issues (see the section *below*).

Monte Carlo age uncertainties are available for all age types. To use this approach, select the `Monte Carlo` check box on the first tab of the main window.

#### 5.2.1 Disequilibrium ages calculated with near equilibrium $^{234}\text{U}/^{238}\text{U}_m$ values

One case in which Monte Carlo uncertainties can be unreliable is when a disequilibrium age is computed using a measured  $^{234}\text{U}/^{238}\text{U}$  activity ratio with an assigned uncertainty that significantly overlaps radioactive equilibrium. In this case, it's likely that a large number of Monte Carlo trials will fail to return convergent age solutions and this makes the results unreliable (or at least, difficult to interpret).

This issue may be demonstrated using a synthetic Tera-Wasserburg data set. If we begin by assuming a true age of 1.80 Ma, an initial  $^{234}\text{U}/^{238}\text{U}$  value of 1.5, and an common  $^{207}\text{Pb}/^{206}\text{Pb}$  value of 0.83, the true slope of the discordia line will be -0.0002275. We can generate 5 simulated data points along this line, and perturb them according to assigned measurement uncertainties (ignoring uncertainty correlations here for simplicity). We then perform a linear regression using the York algorithm, i.e., model 1 (see Fig. Fig. 5.1).

The present  $^{234}\text{U}/^{238}\text{U}$  value can be calculated from the known age and initial  $^{234}\text{U}/^{238}\text{U}$ , giving  $^{234}\text{U}/^{238}\text{U}_m = 1.0031$ . To this value, we may assign an arbitrary (but realistic) measurement uncertainty of 0.0014 ( $2\sigma$ ). Performing a Monte Carlo simulation with 10 000 trials using these inputs, gives an age of 1.797 (95% CI) (1.744, 1.860) Ma and a  $^{234}\text{U}/^{238}\text{U}_i$  solution of 1.549 (95% CI) (1.385, 1.681). The results of the Monte Carlo simulation are shown in Fig. Fig. 5.2. Only 1 of the 10,000 trials failed. Such a small number will not affect results, and so we may consider the uncertainties calculated from this simulation to be reliable.

We can repeat this simulation using a true age of 2.60 Ma, but keeping the initial  $^{234}\text{U}/^{238}\text{U}$  and common  $^{207}\text{Pb}/^{206}\text{Pb}$  values the same. This yields a measured  $^{234}\text{U}/^{238}\text{U}$  value of  $1.00057 \pm 0.0014(2\sigma)$ , which overlaps

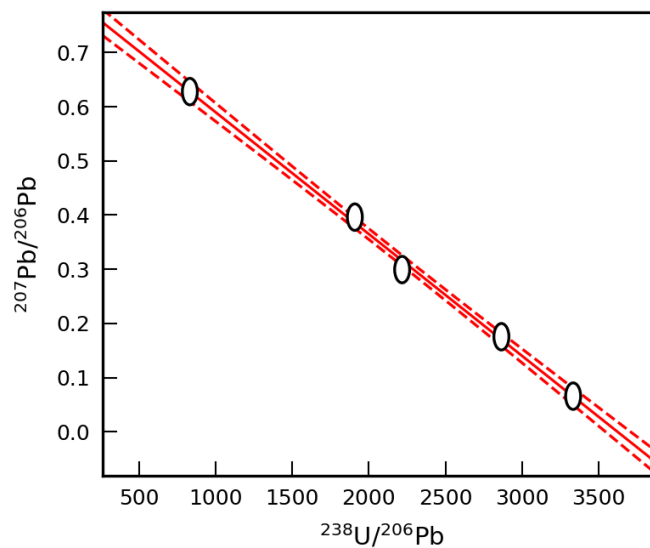

Fig. 5.1: Linear regression of simulated data set with a true age = 1.80 Ma and  $[^{234}\text{U}/^{238}\text{U}]_i = 1.5$ .

the radioactive equilibrium value significantly. We now repeat the data point simulation and re-fit the linear regression for the slope corresponding to 2.60 Ma (see Fig. Fig. 5.3).

Performing 10,000 Monte Carlo trials with these new inputs, gives an age of 2.595 (95% CI) (2.362, 2.99) Ma and a  $[^{234}\text{U}/^{238}\text{U}]_i$  solution of 2.01 (95% CI) (0.97, 2.65). The results of the Monte Carlo simulation are shown in Fig. Fig. 5.4.

This time 1 464 of the 10 000 trials failed. This is a significant number, which may bias uncertainties calculated from this simulation. Note that these failed trials were not rejected by the algorithm because they returned a negative initial  $[^{234}\text{U}/^{238}\text{U}]$  value, but rather because there was no convergent age solution available (i.e., the simulated discordia line did not intercept the simulated concordia curve). This can be demonstrated by plotting the concordia curves for the failed trials as Fig. 5.5.

To confirm that simulated regression lines do not intercept the corresponding concordia curve for each trial, we plot the simulated discordia lines and zoom in (see Fig. Fig. 5.6). Because the resulting plot becomes very cluttered, we only include the first 20 failed trials, but the same thing is observed for all failed trials of the simulation. For further clarity, these simulated concordia curves have been truncated where the age and  $[^{234}\text{U}/^{238}\text{U}]_m$  returns a physically impossible negative  $[^{234}\text{U}/^{238}\text{U}]_i$  value.

We see that the simulated regression lines for these failed trials do not intercept the corresponding concordia curve, meaning that no intercept age solution is available for this combination of inputs to the age equation.

## 5.2.2 Monte Carlo quality control checks

To alert users of potential problems with Monte Carlo simulations, DQPB implements two checks when calculating uncertainties:

1. Measured activity ratio values are checked before age calculation to ensure that they are analytically resolvable from radioactive equilibrium with 95% confidence. Where this criterion is not met, a warning is displayed (Fig. 5.7), and the Monte Carlo simulation does not proceed. The age is still reported, but the uncertainties are listed as 'undef.' (i.e., undefined).

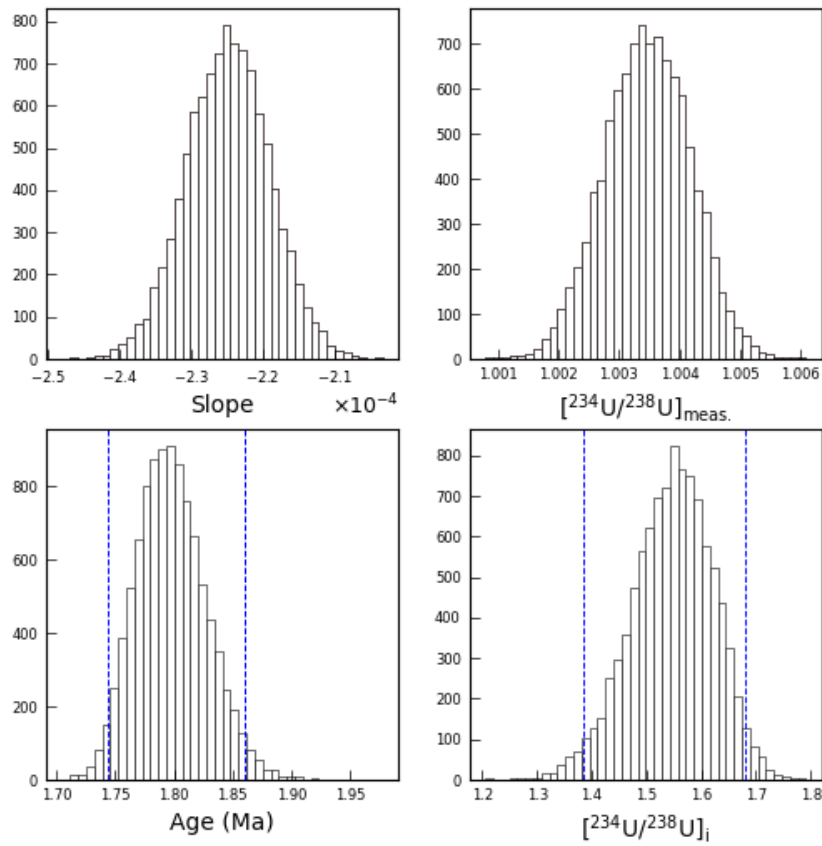

Fig. 5.2: Monte Carlo simulation results for simulated data set with true age = 1.80 Ma and measured  $[^{234}\text{U}/^{238}\text{U}] = 1.0031 \pm 0.0014(2\sigma)$ . Red bars indicate values for all trials, and white bars indicate values for successful trials only. Note the one single failed iteration is not visible in this plot.

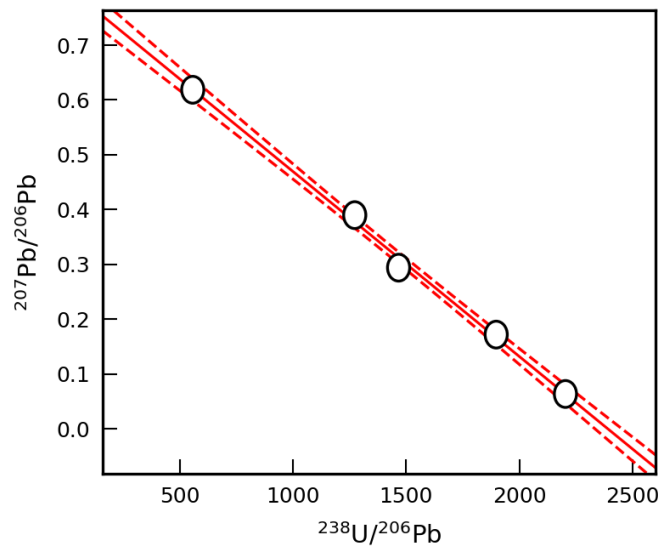

Fig. 5.3: Linear regression of simulated data set with a true age of 2.60 Ma and  $[^{234}\text{U}/^{238}\text{U}]_i = 1.5$ .

2. After a Monte Carlo simulation is completed, a second check is performed to verify that a minimum proportion of trials were successful (the default value is set to 97.5%). Where this second criterion is not met, the software displays a warning that Monte Carlo simulation results may be biased by excessive failed trials and should not be used (Fig. 5.8). This second warning may also be triggered if the PDF of an initial activity ratio value significantly overlaps negative values (e.g., if the value of an initial activity ratio significantly overlaps zero within its uncertainty).

### 5.2.3 Isochron ages calculated with near equilibrium $[^{234}\text{U}/^{238}\text{U}]_m$ values

The same issue may be encountered when computing  $^{206}\text{Pb}/^{238}\text{U}$  isochron ages using measured  $[^{234}\text{U}/^{238}\text{U}]$  activity ratios that are not clearly analytically resolvable from radioactive equilibrium, although this is not as easy to demonstrate graphically. Therefore, measured activity ratio values are checked before age calculation to ensure that they are analytically resolvable from radioactive equilibrium with 95% confidence here too.

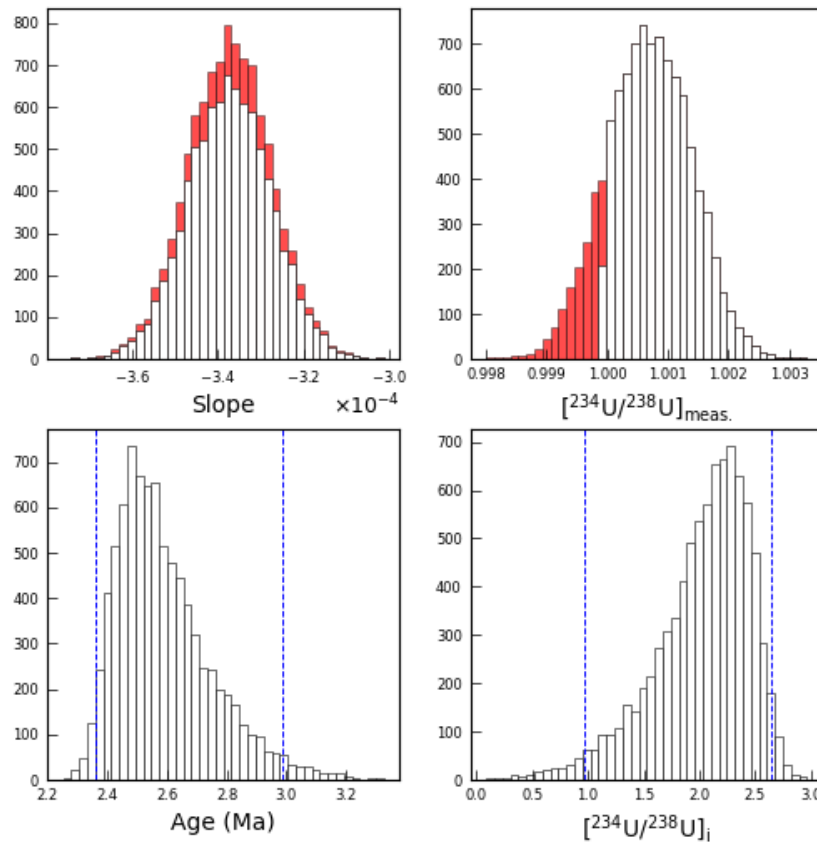

Fig. 5.4: Monte Carlo simulation results for simulated data set with true age = 2.60 Ma and measured  $[^{234}\text{U}/^{238}\text{U}] = 1.00057 \pm 0.0014(2\sigma)$ . Again, red bars indicate values for all trials, and white bars indicate values for successful trials only. Note that the white bars overlay the red bars.

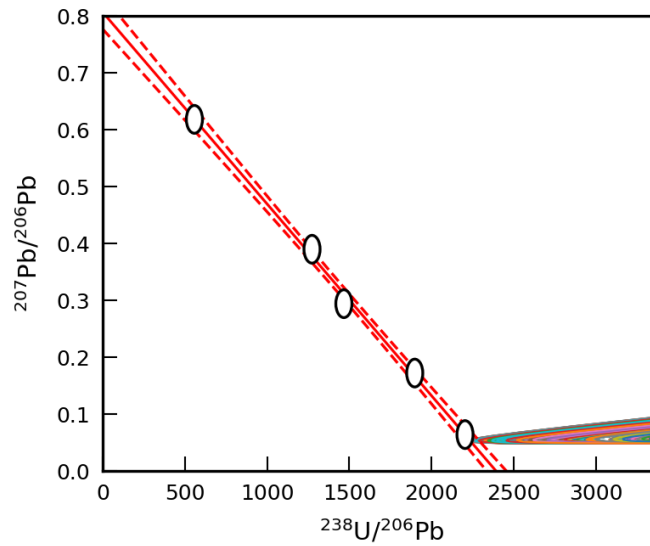

Fig. 5.5: Linear regression of simulated data set with a true age = 2.60 Ma and  $[^{234}\text{U}/^{238}\text{U}]_i = 1.5$ , with the simulated concordia curves for failed trials plotted as the rainbow lines.

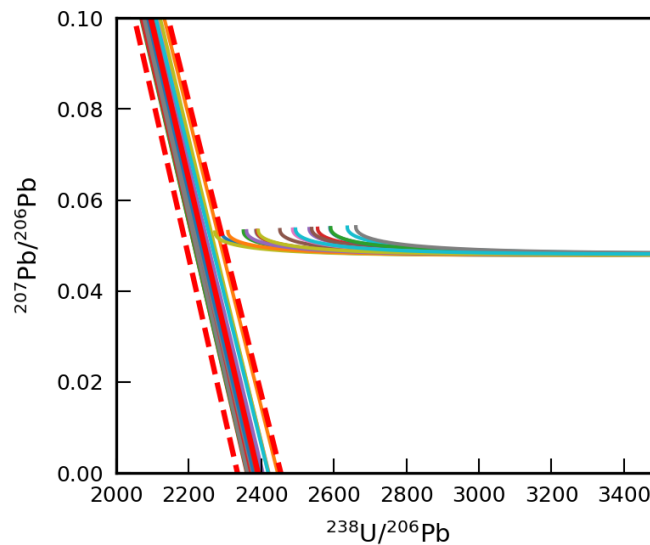

Fig. 5.6: The same plot as above, but zoomed in. Simulated concordia curves and regression lines for the first 20 failed trials that enter this zoomed in part of the plot are shown. The concordia curves are truncated where age and  $[^{234}\text{U}/^{238}\text{U}]_m$  returns a physically impossible negative  $[^{234}\text{U}/^{238}\text{U}]_i$  value. Note that regression lines do not intercept the corresponding concordia curve (indicated by the concordia curve of the same colour) for these trials.

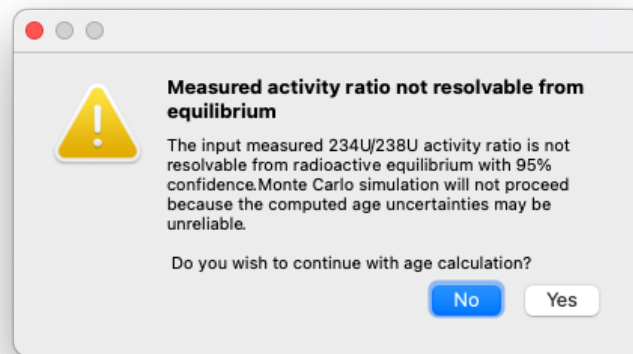

Fig. 5.7: Measured activity ratio not resolvable warning

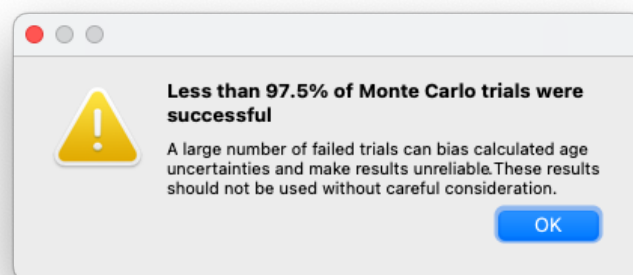

Fig. 5.8: Monte Carlo failed trials error dialog

## OTHER CALCULATION AND PLOTTING FUNCTIONALITY

### 6.1 Plot any x-y data

This routine allows arbitrary 2-dimensional data points to be plotted as 95% confidence ellipses. To invoke this routine select **Plot x-y data** option from the task combo box on the main window.

Data point columns should be arranged as:

$x, u(x), y, u(y), \rho$  (optional))

where  $u$  denotes uncertainty (at given  $\sigma$  level), and  $\rho$  denotes correlation coefficient.

If the **Data type** is set to **Tera-Wasserburg**, then an equilibrium or disequilibrium concordia curve may also be plotted by setting the activity ratios as for a disequilibrium *age calculation*, and setting concordia plot options in the **Isochron** tab of the *type-specific plot options* window.

If the 'Data type' option is set to **other x-y**, then axis labels may be set in the 'Axis labels' dialog that pops up after clicking **Ok**. For mathematical symbols and expressions, LaTeX syntax can be used (enclosed in dollar symbols). For example, use  $\text{\$}^{238}\text{\$U}$  for  $^{238}\text{U}$  or  $\text{\$}\delta^{18}\text{\$O}$  for  $\delta^{18}\text{O}$ .

To perform a linear regression, select a regression algorithm from the 'Fit type' combo box, or otherwise, select **No fit**.

### 6.2 Linear regression of any x-y data

To perform linear regression on an arbitrary 2-dimensional dataset, follow the steps above and choose a regression algorithm from the 'Fit type' drop-down menu.

---

**Note:** If applying a regression algorithm to an arbitrary dataset, be sure that the dataset conforms to the underlying assumptions of the regression algorithm.

---

## 6.3 Weighted average calculations

To compute a weighted average for arbitrary data points, select **Weighted average** from the task combo box on the main window, then choose either the *Spine* or *classical* algorithms from the 'Fit type' combo box. Data point uncertainties may either be specified as:

- independent uncertainties on each data point
- a covariance matrix that accounts for uncertainties and uncertainty covariances

For the former option, the data selection should contain two columns (the values in the first, and their uncertainties in the second). For the latter option, check the **Covariance matrix** option under on the main window. The data selection should contain a single column of values to be averaged. After clicking **Ok**, a dialog will then pop up allowing you to select the  $n \times n$  covariance matrix data from Excel.

## LINEAR REGRESSION ALGORITHMS

The following linear regression algorithms may be selected when computing U-Pb ages or fitting a regression line to arbitrary x-y data.

### 7.1 Classical

This routine emulates the default Isoplot line fitting routine [LUDWIG2012]. Firstly, a linear regression is performed using the *model 1* algorithm. By default, if MSWD is within its one-sided 85% confidence limit for the given degrees of freedom, (equivalent to a ‘probability of fit’ value above 0.15), then the fit is accepted as is. If the MSWD is between the 85% and 95% one-sided confidence limits (equivalent to a ‘probability of fit’ value between 0.15 - 0.05), then the slope and y-intercept values are retained, but uncertainties are expanded as per the *model 1x fit*. If the MSWD exceeds the one-sided 95% confidence limit (equivalent to a ‘probability of fit’ value below 0.05) then a linear regression is instead performed using the *model 2* algorithm for concordia intercept datasets, or the *model 3* for “classical” isochron datasets. Note that the model 3 algorithm parametrises ‘excess scatter’ as a Gaussian distributed component of scatter in the initial Pb isotope ratio. This assumption may not be applicable to all datasets and should be carefully considered.

### 7.2 Spine

The robust line fitting algorithm described in [POWELL2020]. This algorithm converges to the classical model 1 for ‘well-behaved’ datasets, but for more scattered data sets, down-weights data points lying away from the central ‘spine’ of data according to the Huber loss function. The spine-width parameter,  $s$ , gives an indication of how well resolved the central linear “spine” of data is, while accounting for assigned uncertainties. Comparing  $s$  with the upper one-sided 95% confidence interval, derived via simulation of Gaussian distributed data sets, provides a means of assessing whether the ‘spine’ of data is sufficiently well-defined to obtain accurate results with this algorithm. The spine algorithm may yield unreliable results for datasets where  $s$  clearly exceeds this upper limit.

### 7.3 Robust model 2

A robust version of the Isoplot model 2 (details provided in Appendix C of the *manuscript*).

## 7.4 Model 1

Equivalent to the Isoplot model 1. Regression parameters and analytical errors are calculated via the algorithm of [YORK2004], which yields equivalent results to the original algorithm of [YORK1969] with errors calculated according to [TITT1979]. Confidence intervals on the slope and y-intercept are computed based on assigned analytical errors alone and are not inflated according observed scatter, since any apparent excess scatter is not deemed statistically significant.

## 7.5 Model 1x

Equivalent to the Isoplot model 1 with “excess scatter”. Regression parameters and analytical errors are calculated via the York algorithm as above for the model 1. These analytical errors are then multiplied by  $\sqrt{\text{MSWD}}$  to account for excess scatter, and further multiplied by the 95th percentile of a Student’s t distribution (with  $n - 2$  degrees of freedom) to obtain 95% confidence limits following [BROOKS1972].

## 7.6 Model 2

Equivalent to Isoplot model 2. The regression line slope is computed as the geometric mean of a y on x ordinary least-squares regression, and that of x on y (see [POWELL2020]). Uncertainties are calculated following McSaveney in [FAURE1977] and these are then multiplied by  $\sqrt{\text{MSWD}}$  and the 95th percentile of a Student’s t distribution (with  $n - 2$  degrees of freedom) to obtain 95 % confidence limits.

## 7.7 Model 3

Equivalent to Isoplot Model 3. This algorithm iteratively adds a uniform component of Gaussian distributed scattered in y to each data point until MSWD converges to 1. This component of excess scatter is returned as an additional model parameter and may have physical significance in some cases. Once a solution is found, slope and y-intercept uncertainties are calculated as per the York algorithm, but including the additional component of scatter, and then multiplied by the 95th percentile of a Student’s t distribution (with  $n - 2$  degrees of freedom) to obtain 95 % confidence limits.

## WEIGHTED AVERAGE ALGORITHMS

The following weighted average algorithms may be selected when computing Pb/U ages, modified  $^{207}\text{Pb}$  ages, or calculating a weighted average for arbitrary data.

### 8.1 Classical

This routine computes a weighted average using standard classical statistics equations (i.e., those given in [POWELL1988]; [LYONS1988]; [MCLEAN2011] etc.). Where uncertainty covariances are negligible, these equations reduce to the standard error weighted mean, e.g. [TAYLOR1997]. If the MSWD exceeds a lower one-sided confidence interval threshold value (85% by default, equivalent to a ‘probability of fit’ value of 0.15) then analytical errors are expanded by  $\sqrt{\text{MSWD}}$  in an effort to account for excess scatter, and further multiplied by the 95th percentile of a Student’s t distribution (with  $n - 1$  degrees of freedom) to obtain 95% confidence limits following the approach of Isoplot [LUDWIG2012]. Where the probability of fit is below a reasonable lower limit (say, 0.05), use of this approach is questionable and a robust approach should be considered instead.

### 8.2 Spine

A robust version of the spine linear regression algorithm that is capable of accounting for uncertainty correlations (details provided in Appendix A of the [manuscript](#)).

## SETTINGS

## 9.1 Main window settings

The following options are available in the first tab of the main window:

**Account for covariance in wav.**

If true, uncertainty correlations are accounted for when computing weighted average ages from Monte Carlo simulation results (applies to Pb/U and  $^{207}\text{Pb}$ -corrected ages only).

**Norm. isotope**

Normalising isotope ( $^{204}\text{Pb}$  or  $^{208}\text{Pb}$ ) for isochron isotope ratios. Only affects plot axis labels, since  $^{208}\text{Pb}$  is treated as a non-radiogenic isotope (and thus should only be used for young samples with low initial Th content).

**Covariance matrix**

Allows data uncertainties to be specified as a covariance matrix when computing weighted averages for arbitrary data. If checked, a dialog will pop up allowing the user to select the covariance matrix data from Excel.

**Age uncertainties**

Approach used to calculate age uncertainties. Select *analytical* to calculate age uncertainties using first-order analytical uncertainty propagation (only available for some age types). Select *Monte Carlo* to propagate uncertainties by Monte Carlo methods.

**Autoscale axis limits**

If checked, plot axis limits will be determined automatically. If not, a dialog will pop up after clicking Ok, allowing the user to specify axis limits for relevant plot types.

**Add data point labels**

If checked, labels are added to plotted data points. After clicking Ok, a dialog will pop up asking the user to select the data point labels from the Excel worksheet.

**Output calc. settings**

Output calculation settings (decay constant values, activity ratio values, Monte Carlo settings, etc.) to spreadsheet along with age results.

**Output plot data**

If checked, all data used to construct plots (e.g., data points, regression lines etc.) will be output to a new Excel spreadsheet.

**Save plots to disk**

Save figures to disk (e.g., to obtain figures in a specific size and/or file type). The save location and file type can be set in the *I/O* tab of the 'Preferences' window. Figure sizes are set in the *type-specific plot options* window.

### 9.1.1 Monte Carlo settings

---

**Note:** These settings will be applied if the *Monte Carlo* age uncertainty option is checked on the first tab of the main window.

---

The following options are available in the ‘Monte Carlo’ tab of the main window:

**Show full Monte Carlo results summary**

Include information on cause of failed trials in Monte Carlo results, and additional summary statistics.

**Number of trials**

Number of age trials to attempt. For single aliquot Pb/U and  $^{207}\text{Pb}$ -corrected ages, this is the number of trials for each individual age.

**Include decay constant errors**

Include the effects of decay constant errors (set in the ‘Constants’ tab of the ‘Preferences’ window). These effects are typically negligible when computing disequilibrium ages for young samples.

---

**Note:** This option does not yet apply to single-analysis Pb/U or  $^{207}\text{Pb}$ -corrected ages.

---

**Include  $^{238}\text{U}/^{235}\text{U}$  errors**

As above, but for the natural present-day  $^{238}\text{U}/^{235}\text{U}$  ratio value. These effects are also typically negligible for young samples.

**Reject negative activity ratio trials**

Reject any trial encountering a negative activity ratio value, both at the initial randomisation stage or as an initial activity ratio solution where a present-day value is input.

**Reject negative age trials**

Reject any trials with a negative age solution.

**Age histogram**

Output a histogram of simulated ages (as well as simulated regression slope and y-intercept values if applicable).

**Activity ratio histograms**

Output a histogram of simulated activity ratio values and computed initial activity ratio solutions (where present-day values are input).

## 9.2 Preferences window

The following options are available in the 'Preferences' window:

### 9.2.1 Plotting

#### Output weighted average plot

Output a plot showing age points with uncertainties, along with the weighted average line and uncertainty envelope, for Pb/U and  $^{207}\text{Pb}$ -corrected ages.

#### Output data ellipse plot for mod. $^{207}\text{Pb}$ ages

Plot  $^{207}\text{Pb}$ -corrected data points on a Tera-Wasserburg diagram. A disequilibrium concordia curve is also plotted if the initial disequilibrium Th/U state is specified as a constant Th/U value.

#### Plot projected lines through $^{207}\text{Pb}$ -corrected data points

Show lines projected from common  $^{207}\text{Pb}/^{206}\text{Pb}$  value through each data point for  $^{207}\text{Pb}$ -corrected data point plots.

#### Equilibrium concordia curve limits

The equilibrium concordia curve will not extend beyond these age limits.

#### Disequilibrium concordia curve limits

The disequilibrium concordia curve on concordia-intercept plots will not extend beyond these age limits.

---

**Note:** Different limits are used for (a) curves constructed based on initial activity ratio values only, (b) curves constructed based on a present-day  $[^{234}\text{U}/^{238}\text{U}]$  value but initial  $[^{230}\text{Th}/^{238}\text{U}]$  value, and (c) curves based on a present-day  $[^{230}\text{Th}/^{238}\text{U}]$  value. The disequilibrium concordia envelope plotting routine will likely fail if limits (b) and (c) are set too high.

---

### 9.2.2 Numerical

#### Min / max age, $[^{234}\text{U}/^{238}\text{U}]_i$ , and $[^{230}\text{Th}/^{238}\text{U}]_i$

Reject disequilibrium concordia-intercept age solutions (where present-day activity ratio(s) are input) if numerical solutions are outside these limits. See Sect. 4.2 of this document for further explanation.

#### Classical linear regression fit MSWD thresholds

MSWD one-sided confidence limit thresholds. The lower limit is the threshold at which model 1 transitions to model 1x. Upper is the threshold at which model 1x transitions to model 2 / 3. Only applies if the *classical* linear regression fit type is selected.

#### Wtd. average excess scatter thresholds

MSWD one-sided confidence limit thresholds. If MSWD is above this lower limit, uncertainty on the weighted average result is inflated according to data scatter. The upper limit is not currently implemented. Only applies to the *classical* weighted average algorithm.

#### RNG seed

Random number generator seed used to generate reproducible Monte Carlo results. Use an integer seed sequence (e.g., 42) or leave blank for non-reproducible results. See: <https://numpy.org/doc/stable/reference/random/generator.html>

#### h value

h value used in the spine linear regression and weighted average routines (default = 1.4).

### 9.2.3 I/O

**Save figures to**

Directory (i.e., ‘folder’) where figures are saved to.

**Export file type**

Image file format of plots saved to disk.

**Spreadsheet figure height**

Height of figures that are output to spreadsheet (in number of cells). Width is determined by original aspect ratio (i.e., the width and height set in the *type-specific plot settings* dialog).

**Apply spreadsheet number formats to results**

Apply number formatting to results output to spreadsheet (e.g., so that the correct number of significant figures are shown). Complete digits are still retained and are visible in the formula bar when the cell is selected, or if the cell is copied to the clipboard.

**Clear cells before printing results**

Clear cells of formatting before printing results to spreadsheet (this may slow down printing results to Excel a bit).

**Font**

Apply a non-default font to results in spreadsheet (this may also slow down printing results to Excel a bit).

**Apply cell colours**

Apply a background colour to results that are output to spreadsheet (this may also slow down printing results to Excel a bit)

## 9.3 Type-specific plot settings

Type-specific plot settings that are only applied to plots of a given type:

---

**Note:** The “Isochron” settings apply to: isochron diagrams, concordia-intercept age “regression plots”, <sup>207</sup>Pb-corrected data plots, and other x-y plots

---

### 9.3.1 All plot types

**comma separated thousands**

E.g., show 10,000 in axis labels instead of 10000.

**hide top and right spines**

Remove the top and right-hand side lines bordering the axis window.

**lower exponent limit**

If axis tick values are less than or equal to  $10^{\text{this limit}}$  they will be displayed in scientific notation.

**upper exponent limit**

If axis tick values are greater than or equal to  $10^{\text{this limit}}$  then they will be displayed in scientific notation.

**height**

Figure height (in inches). This may be different to the height of the figure output to Excel (which is

set as height in number of cells via the *I/O* tab of ‘Preferences’ window), however, figures exported to disk will be set to this height.

**width**

Figure width (in inches). As above, this may be different to the width of the figure output to Excel, however, figures exported to disk will be set to this width.

**dpi**

Dots per square inch of exported figures (only applied to certain image file types such as .png)

## 9.3.2 Concordia intercept plots

**plot concordia intercept ellipse**

Plot the Monte Carlo concordia intercept points from each successful Monte Carlo trial as a confidence ellipse.

---

**Note:** This option is not suitable for plots displaying large intercept age errors.

---

**plot concordia intercept x-y points**

Plot the concordia intercept points for each successful Monte Carlo trial as individual markers.

**plot concordia uncertainty envelope**

Plot uncertainty envelope about the concordia curve representing uncertainty arising from activity ratio uncertainties.

**‘spaghetti’ type concordia envelope**

Plot each Monte Carlo simulated curve used to construct the concordia envelope. This can be useful for diagnosing problems with concordia envelope plotting.

**plot concordia age markers as ellipses**

Plot each age marker along the concordia curve as a confidence ellipse accounting for uncertainty in activity ratio values for disequilibrium curves or decay constant values for equilibrium curves.

---

**Note:** This setting may work poorly if activity ratio values have large errors. May also fail for older ages if present-day activity ratios are set (in such cases, reduce the ‘auto markers max age’ value).

---

**auto markers max age**

Automatically generated concordia age markers / ellipses will not exceed this value.

**use manual marker ages**

Option to plot concordia age markers or ellipses at user specified locations that are set in the field below.

**manual age marker locations**

Enter manual concordia age marker locations, separating each age by a space. These should be in same ‘units’ as the `age label prefix` option.

**show age prefix in label**

Show ‘Ma’ or ‘ka’ in concordia age marker labels.

**rotate labels**

Rotate concordia age marker labels according to the settings below.

**rotate perpendicular**

If checked, rotate perpendicular to concordia line slope at the age marker position (only applies if the `rotate labels` option is selected). Otherwise, rotate parallel to the concordia line slope.

**avoid label overlaps**

Any concordia age markers older than the first marker that is overlapped will be removed.

**label offset factor**

Controls how far concordia age marker labels are offset from markers (higher number = further away from concordia marker).

### 9.3.3 Plot format settings

Plot format settings (e.g., colours, line thicknesses, fonts) can be set in the ‘Plot format settings’ window. These settings are mostly self-explanatory, but keep in mind:

- ‘zorder’ determines the order in which elements are overlayed on a figure (i.e., those which a higher ‘zorder’ will be placed on top of those with a lower ‘zorder’. These values must be positive whole numbers.
- Setting a linewidth to 0 will make the line (and in some cases the plot element) disappear.
- Alpha is a transparency setting between 0 (clear) and 1 (opaque).
- Colours may be selected from the matplotlib named colours via the drop-down combo boxes. Named colours are shown below. Alternatively, colours may be entered into the combo box as a case-insensitive (8-bit per channel) **hexadecimal RGB string** (e.g.: #0f0f0f). These values can be obtained from colour selection dialogs in applications such as Excel.

### 9.3.4 Matplotlib named colors

The following named colors are available in the color drop-down boxes in the *plot formatting* window.

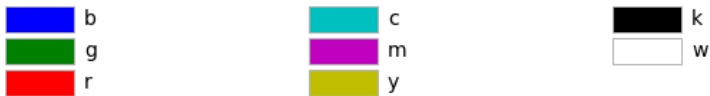

Fig. 9.1: Matplotlib base colors

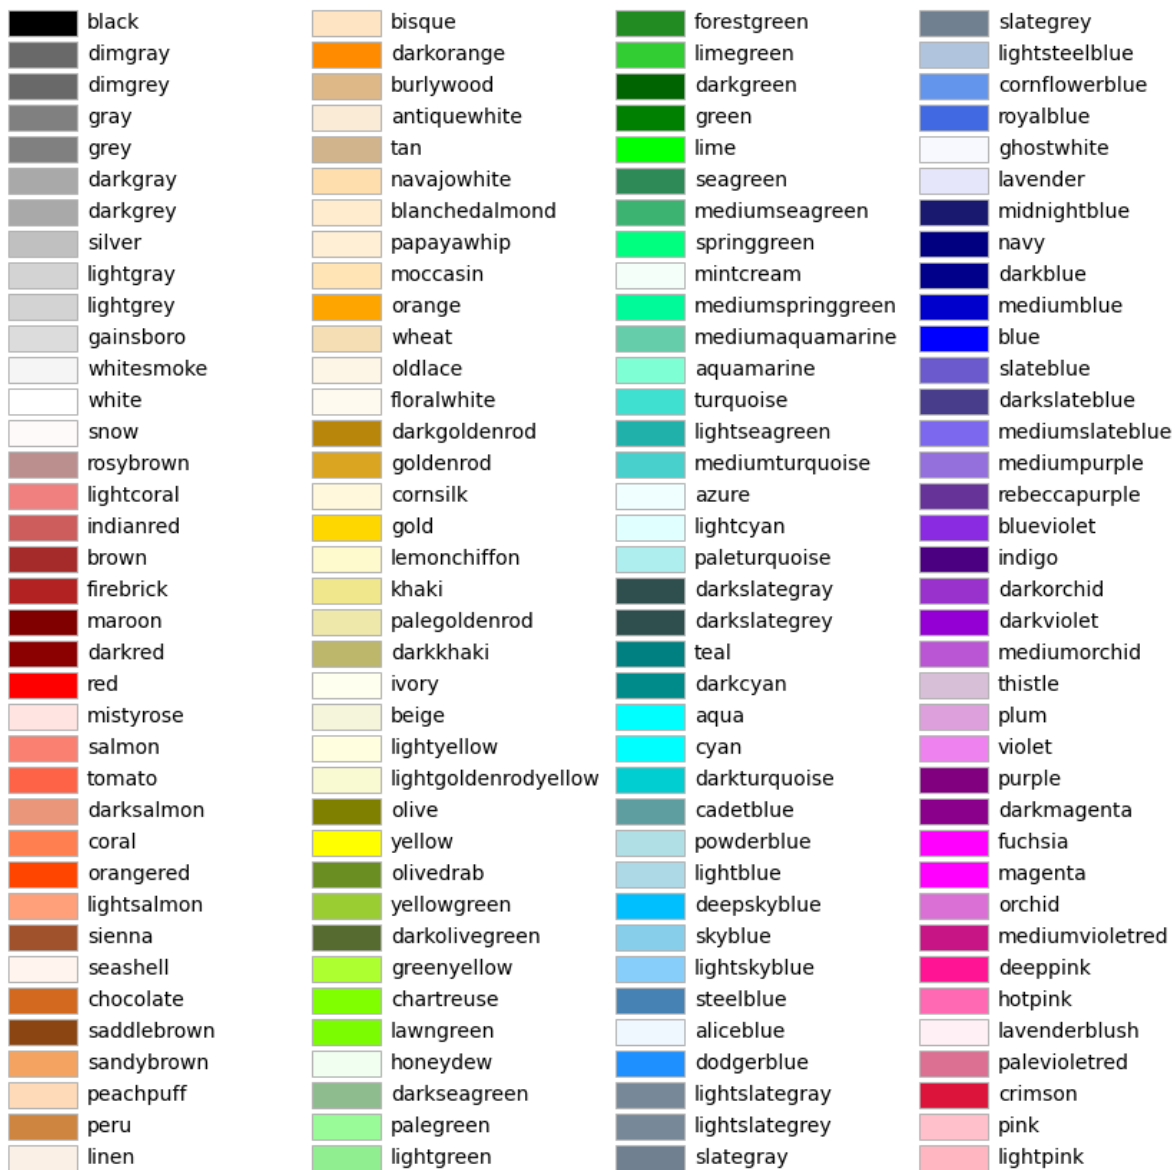

Fig. 9.2: Matplotlib css colors

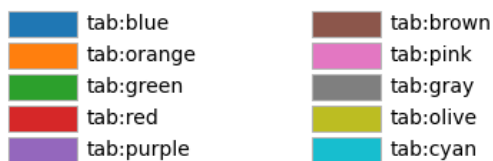

Fig. 9.3: Matplotlib tableau colors

---

## TROUBLESHOOTING

### 10.1 The log console

All software errors and warnings encountered while DQPB executes a plotting or calculation task are logged. To view this log, navigate via the file menu to **Window → Log console...** The content of the log includes information, warnings, and errors logged directly by the DQPB program, and also errors logged by third-party Python modules. The errors (technically speaking, “exceptions”) logged by third-party Python modules are presented as a Python “traceback”. This may be difficult to interpret for non-python programmers but reading the last line or two will often provide a hint as to what went wrong. The log console should be your first port of call anytime something unexpected happens and should be routinely checked.

### 10.2 Unfreezing Excel workbooks

While DQPB is executing tasks, the Excel screen is locked in order to increase the speed at which results are printed back to the spreadsheet. In the event that DQPB crashes while executing a task, or is closed by the user, it is possible for the Excel screen to remain locked. To unfreeze the Excel screen, re-launch DQPB and navigate via the file menu to **File → Unfreeze Excel screen updating**.

### 10.3 Overwriting old results

Numerical results output to Excel may overwrite any pre-existing cell data if the calculation/plotting task is re-run and an inappropriate output location is selected. To avoid this happening, it is best to delete old results and plots before re-running a task. Also, note that new figures output to Excel will be stacked on top of old figures. If too many figures accumulate this may slow down Excel, so it is a good idea to delete old figures as you go.

### 10.4 Crowded concordia markers

The concordia curve plotting routine attempts to find a suitable spacing for age markers given the plot axis limits and the concordia age limits (set in the ‘plotting’ tab of the *preferences* window). However, for Tera-Wasserburg diagrams that span a large range of x values (say, 0 - 10 000), there is often no constant age marker spacing that will deliver satisfactory results, and markers will tend to be bunched together at the left-hand side of the plot. There are at least three possible ways to address this:

1. Set manual age markers (see the ‘Isochron’ or ‘Concordia-intercept’ tabs of the *type-settings plot settings* window). Tick the **use manual age markers** option and set the ages in the **manual age markers** field below (separate each marker age by a space).

2. Use the auto age marker routine (untick the use manual age markers option) but set the auto markers max age to a suitable age lower than the concordia age limits.
3. Use the auto age marker routine (untick the use manual age markers option), but reduce the concordia age limit. Note this will also truncate the concordia curve line itself.

## **FREQUENTLY ASKED QUESTIONS**

Coming soon...

## BIBLIOGRAPHY

- [BROOKS1972] Brooks, C., Hart, S.R., Wendt, I., 1972. Realistic use of two-error regression treatments as applied to rubidium-strontium data. *Reviews of Geophysics* 10, 551–577. <https://doi.org/10.1029/RG010i002p00551>
- [ENGEL2019] Engel, J., Woodhead, J., Hellstrom, J., Maas, R., Drysdale, R., Ford, D., 2019. Corrections for initial isotopic disequilibrium in the speleothem U-Pb dating method. *Quaternary Geochronology* 54, 101009. <https://doi.org/10.1016/j.quageo.2019.101009>
- [FAURE1977] Faure, G., Appendix 1: Fitting of isochrons for dating by the Rb-Sr method, in: *Principles of Isotope Geology*. John Wiley and Sons, pp. 1–17, 1977.
- [LUDWIG2012] Ludwig, K. R.: Isoplot/Ex Version 3.75: A Geochronological Toolkit for Microsoft Excel, Special Publication 4, Berkeley Geochronology Center, 2012.
- [LYONS1988] Lyons, L., Gibaut, D., Clifford, P., 1988. How to combine correlated estimates of a single physical quantity. *Nuclear Instruments and Methods in Physics Research Section A: Accelerators, Spectrometers, Detectors and Associated Equipment* 270, 110–117. [https://doi.org/10.1016/0168-9002\(88\)90018-6](https://doi.org/10.1016/0168-9002(88)90018-6)
- [MCLEAN2011] McLean, N. M., Bowring, J. F., and Bowring, S. A.: An Algorithm for U-Pb Isotope Dilution Data Reduction and Uncertainty Propagation, *Geochemistry, Geophysics, Geosystems*, 12, <https://doi.org/10.1029/2010GC003478>, 2011.
- [POWELL2020] Powell, R., Green, E.C.R., Marillo Sialer, E., Woodhead, J., 2020. Robust isochron calculation. *Geochronology* 2, 325–342. <https://doi.org/10.5194/gchron-2-325-2020>
- [POWELL1988] Powell, R. and Holland, T.: An Internally Consistent Dataset with Uncertainties and Correlations: 3. Applications to Geobarometry, Worked Examples and a Computer Program, *Journal of Metamorphic Geology*, 6, 173–204, <https://doi.org/10.1111/j.1525-1314.1988.tb00415.x>, 1988.
- [TAYLOR1997] Taylor, J., 1997. *Introduction to Error Analysis, the Study of Uncertainties in Physical Measurements*, 2nd Edition, Published by University Science Books. University Science Books, New York.
- [TITT1979] Titterton, D.M., Halliday, A.N., 1979. On the fitting of parallel isochrons and the method of maximum likelihood. *Chemical Geology* 26, 183–195.
- [YORK2004] York, D., Evensen, N.M., Martinez, M.L., De Basabe Delgado, J., 2004. Unified equations for the slope, intercept, and standard errors of the best straight line. *American Journal of Physics* 72, 367–375. <https://doi.org/10.1119/1.1632486>
- [YORK1969] York, D., 1969. York, D., 1968. Least squares fitting of a straight line with correlated errors. *Earth and Planetary Science Letters* 5, 320–324. [https://doi.org/10.1016/S0012-821X\(68\)80059-7](https://doi.org/10.1016/S0012-821X(68)80059-7)
